# Supplementary material for: Early decrease of blood myeloid-derived suppressor cells during checkpoint inhibition is a favorable biomarker in metastatic melanoma
Source: PubMed Central journal article supplement (PMC10254874; doi:10.1136/jitc-2023-006802), 2023-06-07
Supplement: jitc-2023-006802supp001.pdf [file jitc-2023-006802supp001.pdf]

## **Early decrease of blood myeloid-derived suppressor cells during checkpoint inhibition is a favourable biomarker in metastatic melanoma**

Andrea Gaißler\*<sup>1,2</sup>, Jonas Bochem\*<sup>1,2</sup>, Janine Spreuer<sup>1,2</sup>, Shannon Ottmann<sup>1</sup>, Alexander Martens<sup>1</sup>, Teresa Amaral<sup>1,3</sup>, Nikolaus Benjamin Wagner<sup>1,4</sup>, Manfred Claassen<sup>2,5</sup>, Friedegund Meier<sup>6</sup>, Patrick Terheyden<sup>7</sup>, Claus Garbe<sup>1</sup>, Thomas Eigentler<sup>8</sup>, Benjamin Weide<sup>1</sup>, Graham Pawelec<sup>9,10</sup>, Kilian Wistuba-Hamprecht<sup>1,2,9</sup>

\*Shared first authorship

### **Supplementary Information**

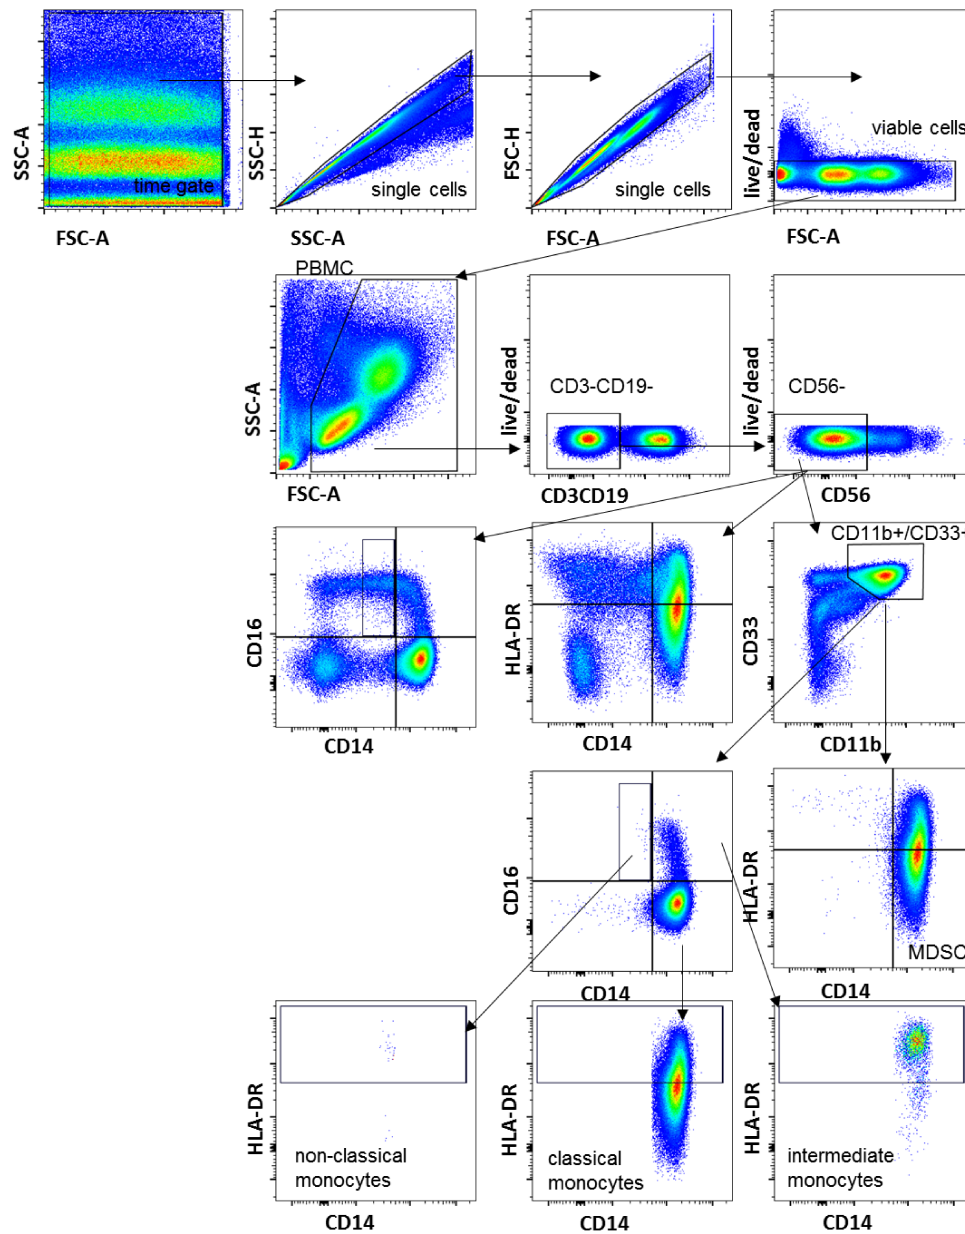

**Supplementary Figure 1:** Gating strategy of the myeloid cell panel. Adjustment of the gates for MDSCs and CD14+CD16-, CD14+CD16+ and CD14dimCD16+ cells were performed on the CD56- population and then copied to the CD11b+CD33+ population. M-MDSC frequencies were calculated to all assessed leukocytes within the PBMC gate.

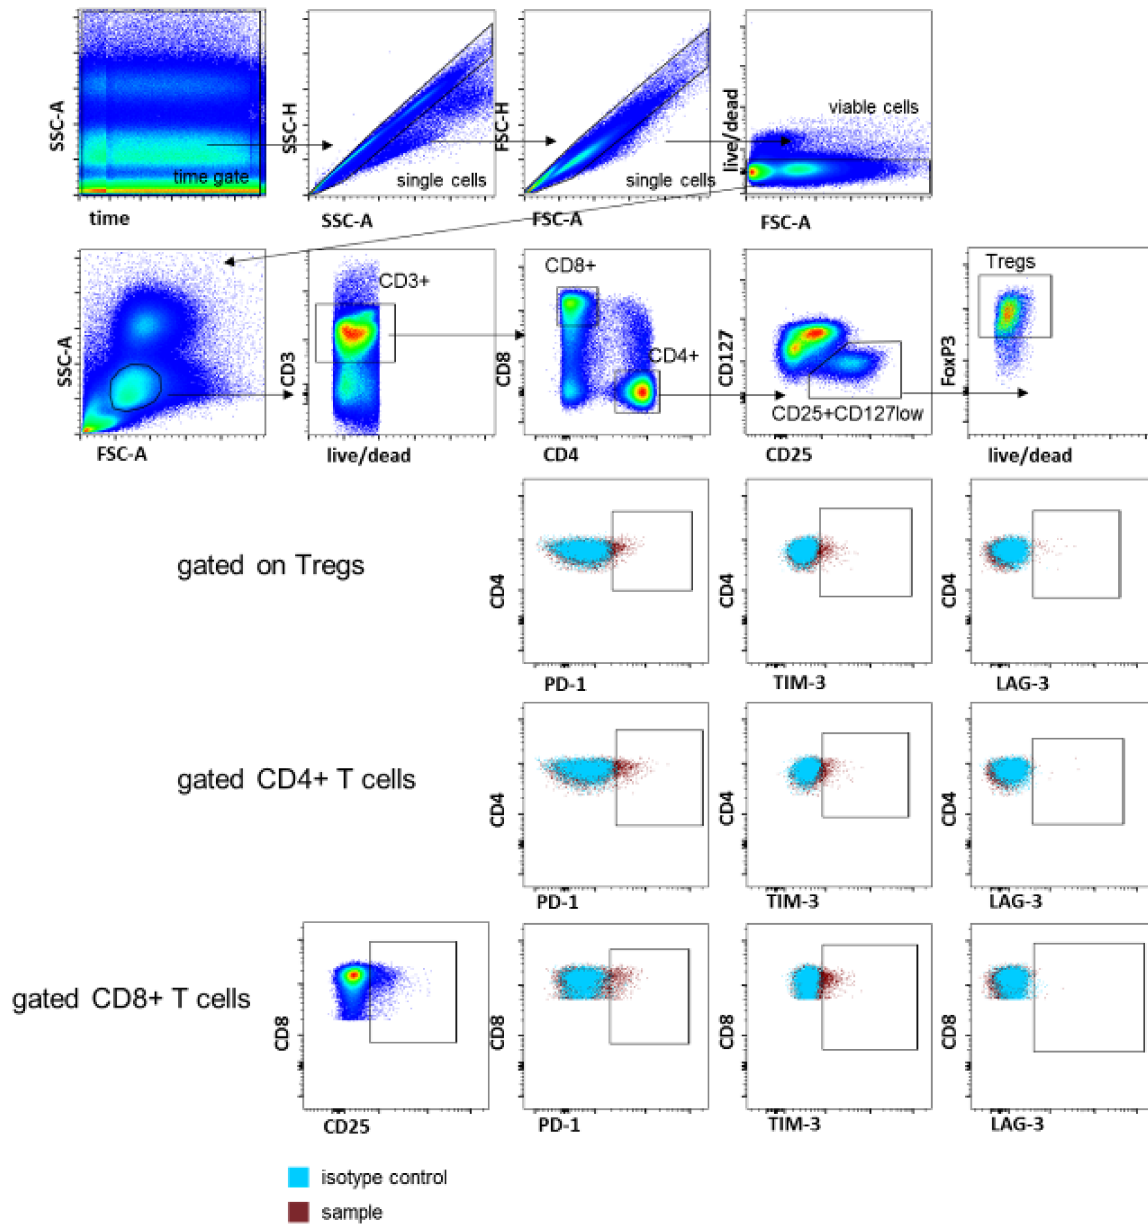

**Supplementary Figure 2:** Gating strategy of the T cell-panel. Gates for the checkpoint molecules were set on the isotype control (blue) and then copied to the sample (red).

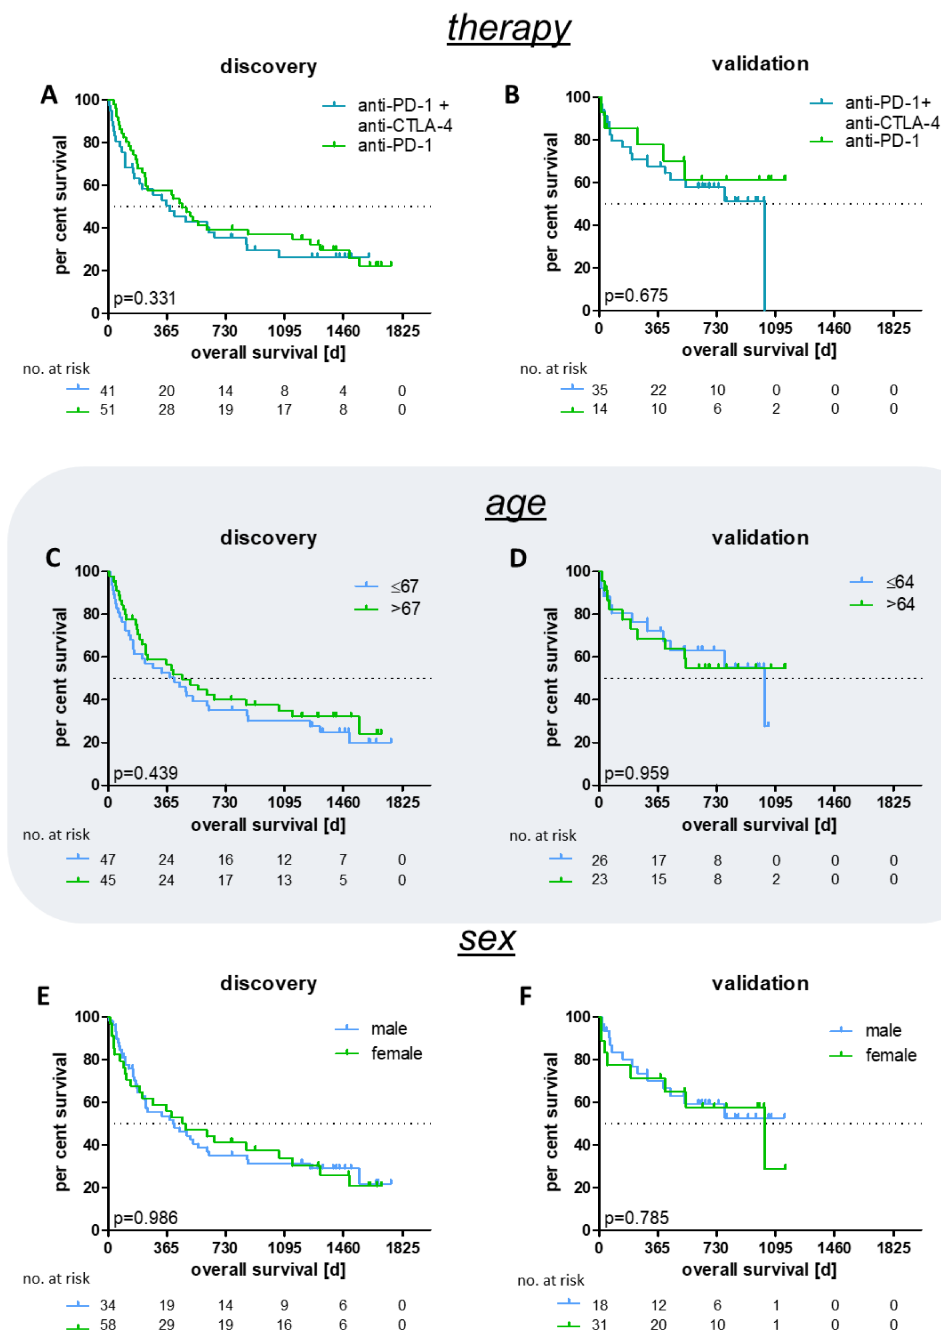

**Supplementary Figure 3:** Investigation of potential correlations of therapy (A:  $p=0.331$  and B:  $p=0.650$ ), age (C:  $p=0.439$  and D:  $p=0.959$ ) and sex (E:  $p=0.986$  and F:  $p=0.785$ ) with overall survival in the discovery and validation cohort using log-rank testing.

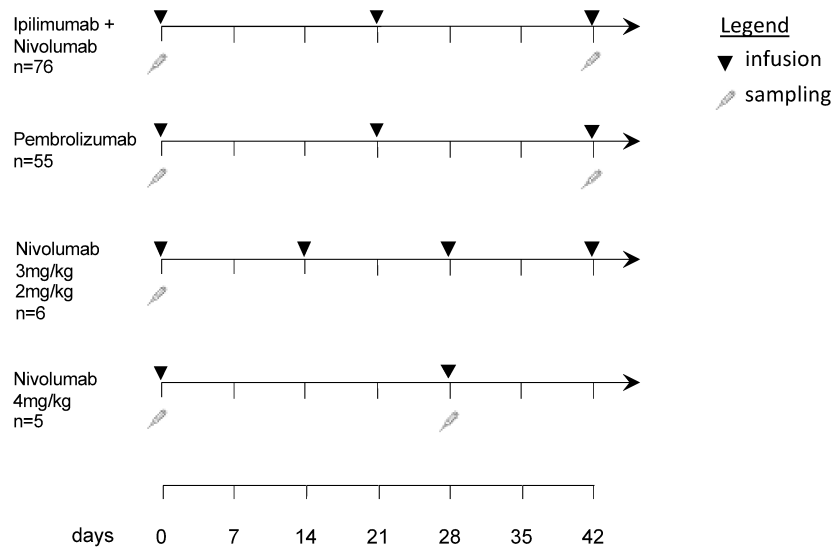

**Supplementary Figure 4:** Overview of the treatment and sample collection protocol.

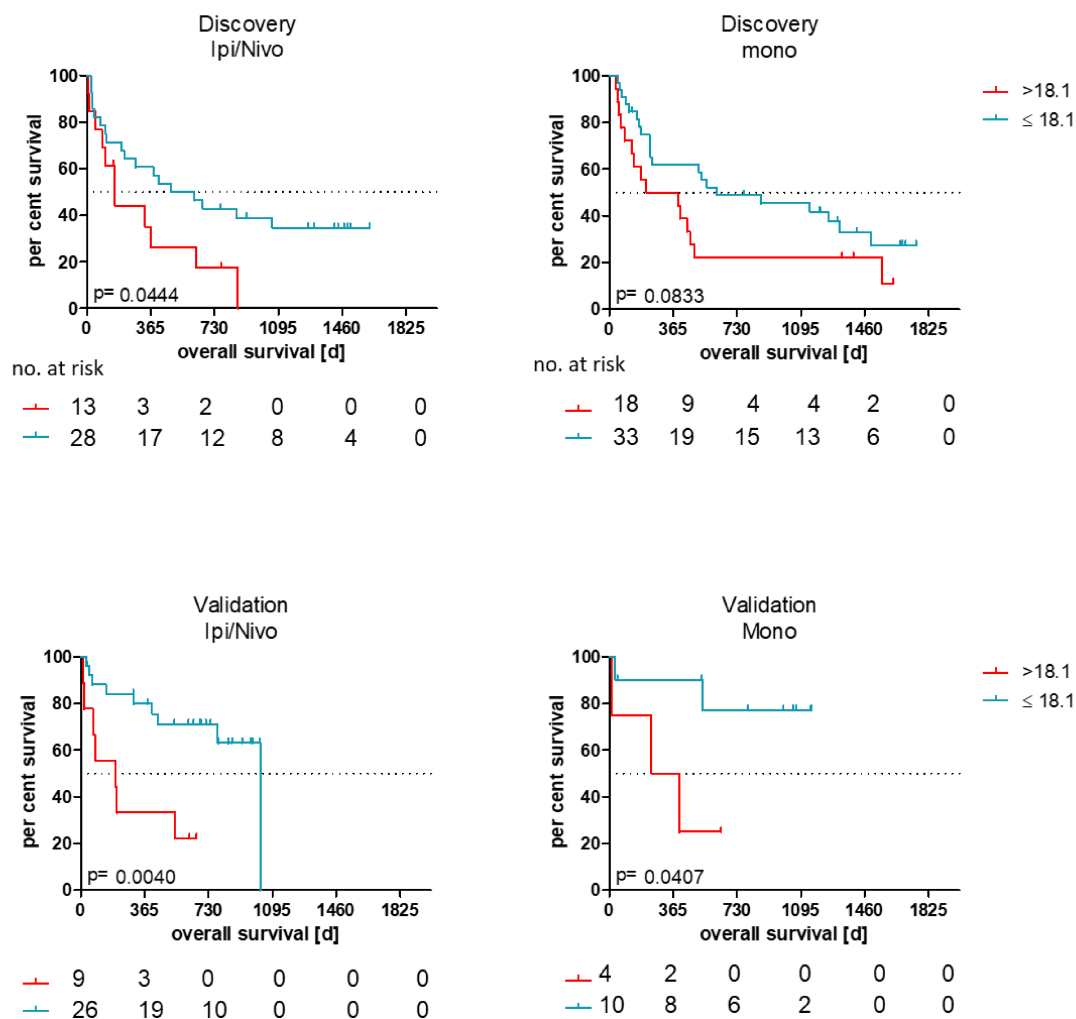

**Supplementary Figure 5:** Investigation of potential correlations of PD-1 mono (Mono)-versus CTLA-4 combination therapy (Ipi/Nivo) in the discovery (upper panel) and validation cohort (lower panel) with the probability of overall survival using long rank testing.

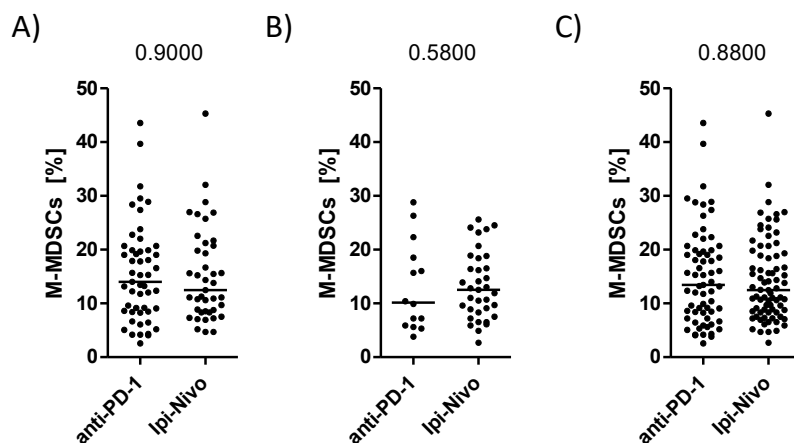

**Supplementary Figure 6:** Comparison of M-MDSC frequencies between PD-1 mono- (anti-PD-1) and CTLA-4 combination (Ipi-Nivo) therapy in A) the discovery, B) the validation, and C) the combined cohorts, applying Mann-Whitney-U testing. Each dot represents an individual patient and lines indicate the populations median.

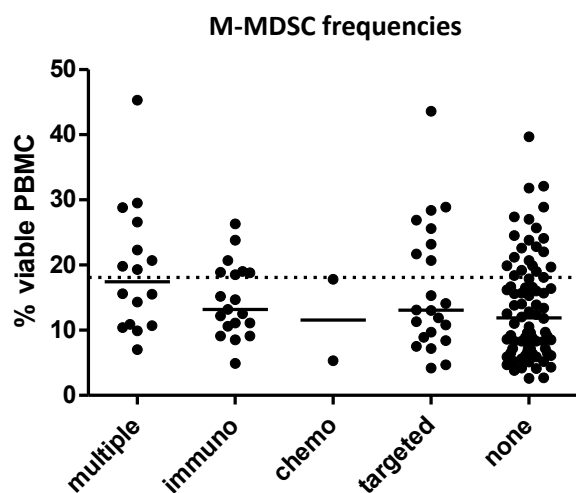

**Supplementary Figure 7:** Stratification of the M-MDSC frequencies of the patients of both cohorts after previous therapies. Each dot represents the M-MDSC frequency of a single patient and lines indicate the population median. Statistical evaluation using one-way ANOVA testing revealed no significant differences.

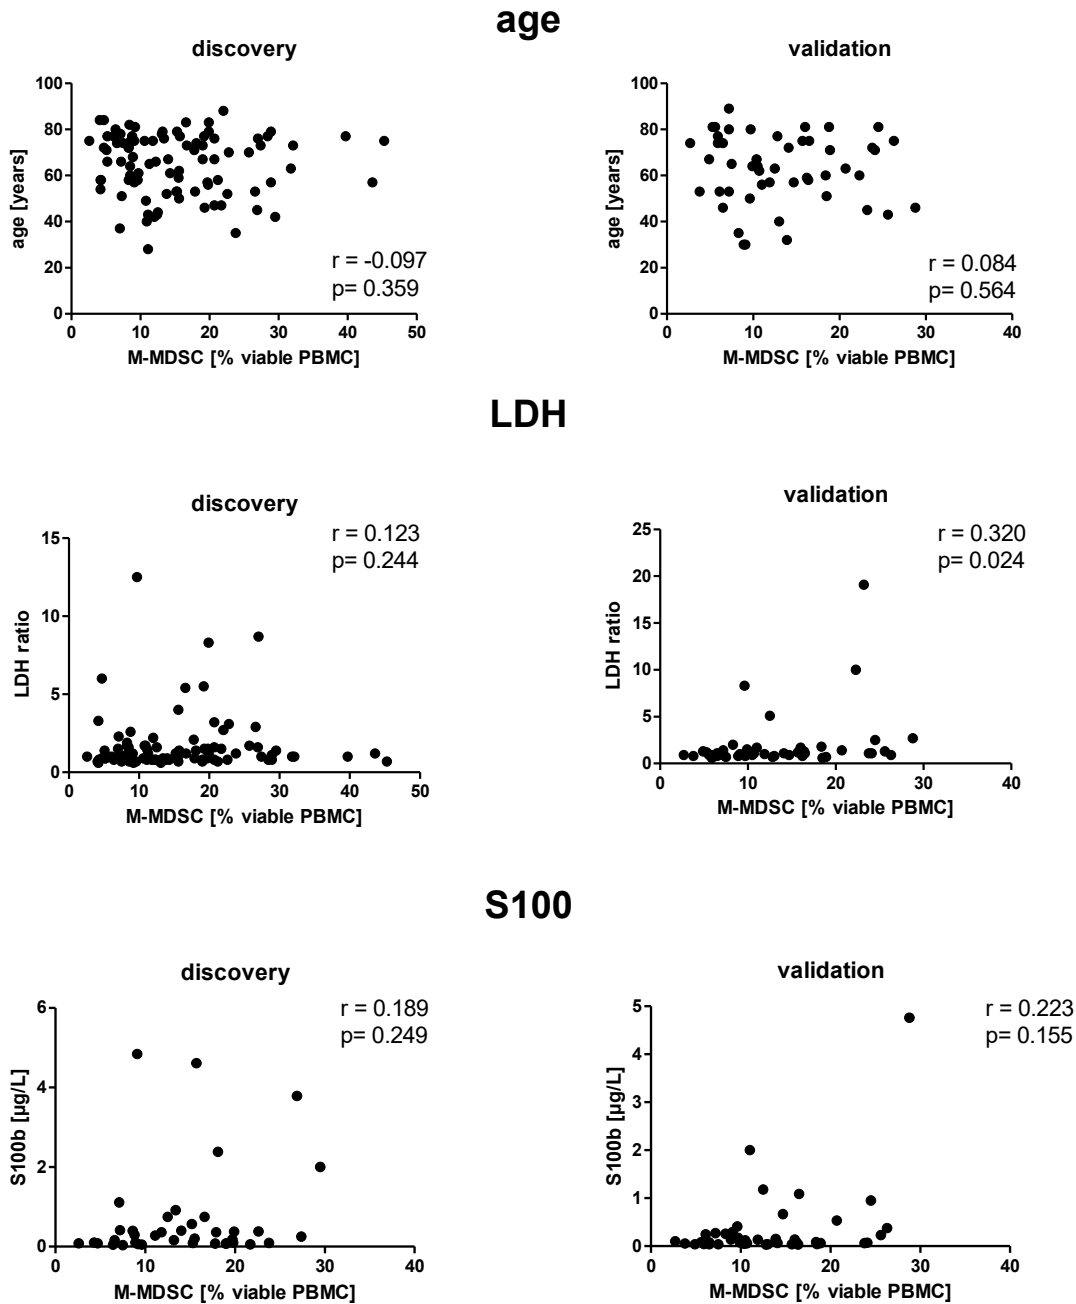

**Supplementary Figure 8:** Correlations of potentially confounding features of the M-MDSC frequencies in the discovery and validation cohort. Spearman R testing was performed to statistically evaluate potential correlations.



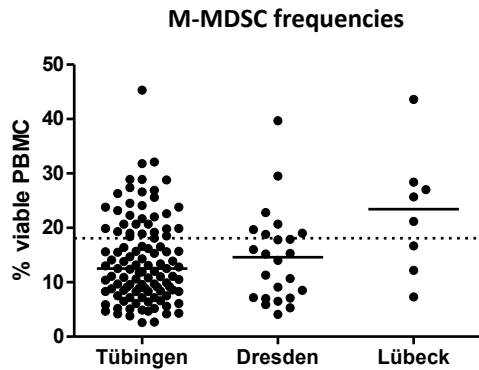

**Supplementary Figure 9:** Comparison of M-MDSC frequencies between the different centers. Each dot represents one M-MDSC frequency of an individual patient before start of therapy and lines indicate the populations median. One-way ANOVA testing did not reveal significant differences between the three centers.

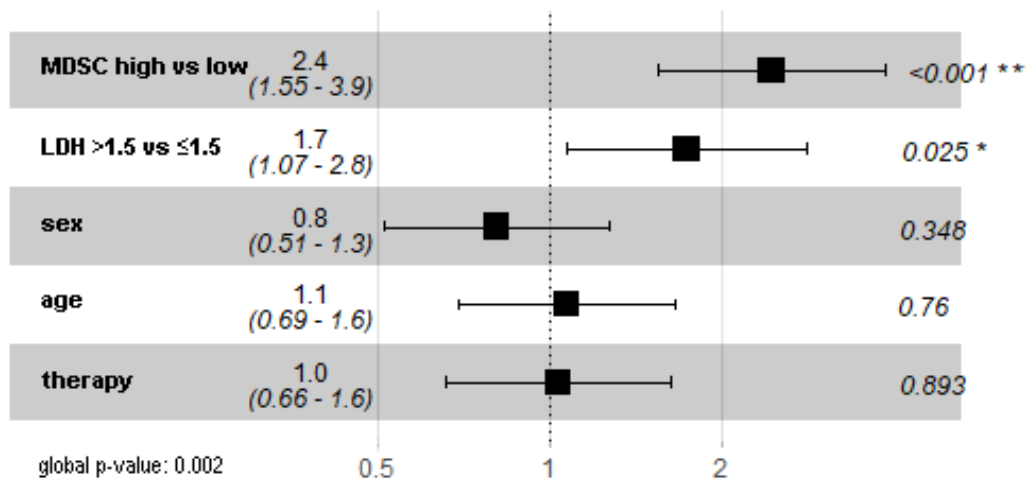

**Supplementary Figure 10:** Forest Plot summarizing the results of a Cox regression analysis of potential confounding features for the identified predictive characteristic of M-MDSC frequencies before the start of therapy and survival under therapy. Only high M-MDSC frequencies and LDH values correlate independently with OS. PD-1 ± CTLA-4 inhibition was used as separator in the variable “therapy”.

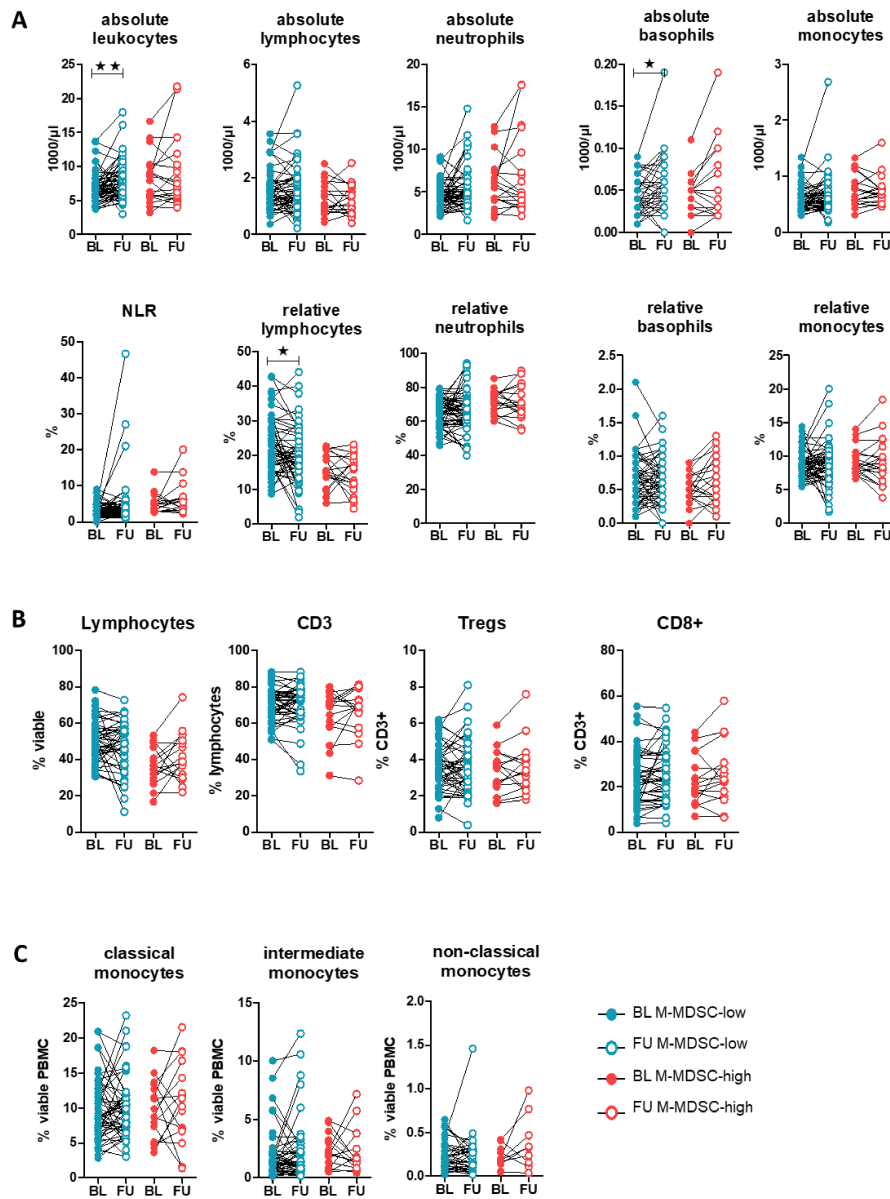

**Supplementary Figure 11:** Comparison of changes in the abundance of immune cell subsets under immune checkpoint blockade in M-MDSC-high versus M-MDSC-low patients: blood counts (A), lymphocytes (B) and of total myeloid cell frequencies (C).

★ $p < 0.05$  ★★ $p < 0.01$

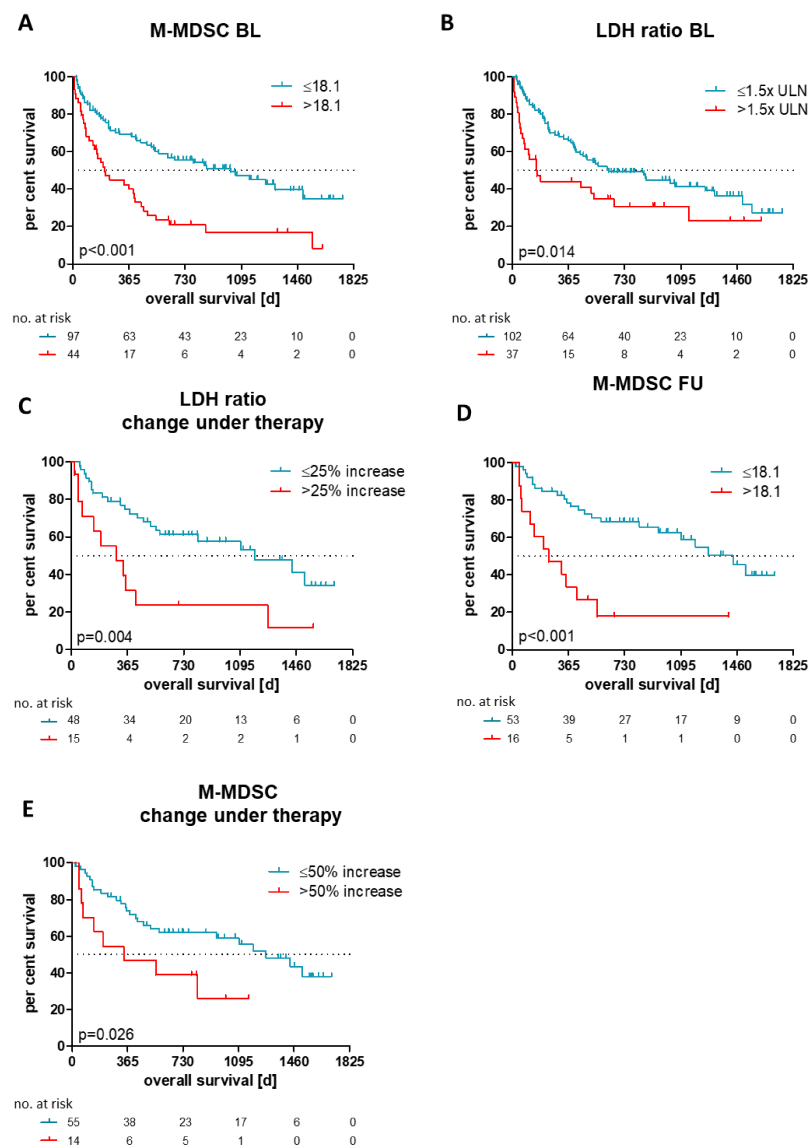

**Supplementary Figure 12:** Univariate analysis of the combined cohort (discovery + validation) at BL of M-MDSC frequency (A:  $p < 0.001$ ), LDH-ratio at BL (LDH serum level divided by the ULN (250 U/L)) (B:  $p = 0.014$ ) and a general increase  $> 25\%$  of the LDH-ratio under immune checkpoint blockade (C:  $p = 0.004$ ). M-MDSC frequencies at FU (D:  $p < 0.001$ ) and an increase of  $> 50\%$  M-MDSC frequencies under immune checkpoint blockade (E:  $p = 0.026$ ).

BL = baseline, FU = follow up, LDH = lactate dehydrogenase, ULN= upper limit of normal

## Supplementary Tables

Supplementary Table 1: Antibodies used in the myeloid cell and the T cell panel

| <i>panel</i>  | <i>marker</i> | <i>clone</i> | <i>fluorophore</i> | <i>vendor</i> | <i>cat</i> |
|---------------|---------------|--------------|--------------------|---------------|------------|
| myeloid cells | CD3           | OKT3         | BV605              | Biolegend     | 317322     |
|               | CD19          | HIB19        | BV605              | Biolegend     | 302244     |
|               | CD16          | 3G8          | PacificBlue        | Biolegend     | 302032     |
|               | CD11b         | ICRF44       | APC-fire           | Biolegend     | 301352     |
|               | CD14          | M5E2         | PE-Cy7             | Biolegend     | 301814     |
|               | CD33          | P67.6        | FITC               | Biolegend     | 366620     |
|               | HLA-DR        | L243         | PerCP-Cy5.5        | BD            | 339216     |
|               | CD56          | HCD56        | BV711              | Biolegend     | 318336     |
|               | CD56          | HCD56        | BV605              | Biolegend     | 318334     |
| T cells       | CD25          | M-A251       | PE                 | BD            | 555432     |
|               | CD127         | AO19D5       | BV510              | Biolegend     | 351322     |
|               | CD8           | SK1          | APC-fire           | Biolegend     | 344746     |
|               | CD8           | SK1          | APC-Cy7            | Biolegend     | 344714     |
|               | CD3           | UCHT1        | A700               | Biolegend     | 300424     |
|               | CD4           | SK3          | PerCP              | BD            | 345770     |
|               | LAG-3         | 11C3C65      | BV421              | Biolegend     | 369314     |
|               | PD-1          | EH12.2H7     | BV711              | Biolegend     | 329928     |
|               | TIM-3         | 7D3          | BB515              | BD            | 565568     |
|               | FoxP3         | 259DC7       | A647               | BD            | 560045     |
|               | Isotype       | MOPC-21      | BV421              | Biolegend     | 400158     |
|               | Isotype       | MOPC-22      | BV711              | Biolegend     | 400168     |
|               | Isotype       | X40          | BB515              | BD            | 564416     |

**Supplementary Table 2:** Summary of Bonferroni corrected p-values from log rank testing of univariate overall survival correlations with blood counts.

| factor                                  | description  | category                    | discovery cohort<br>n=92 |                     | validation cohort<br>n=49 |                     |
|-----------------------------------------|--------------|-----------------------------|--------------------------|---------------------|---------------------------|---------------------|
|                                         |              |                             | log rank<br>p-value      | Inter-<br>pretation | log rank<br>p-value       | inter-<br>pretation |
| leukocytes<br>[1000/ $\mu$ L]           | median       | $\leq 7.05$ vs $> 7.05$     | 0.867                    | failed              |                           |                     |
|                                         | lower cutoff | $< 6.11$ vs $\geq 6.11$     | 2.661                    | failed              |                           |                     |
|                                         | upper cutoff | $\leq 7.91$ vs $> 7.91$     | 0.927                    | failed              |                           |                     |
| erythrocytes<br>[1mio/ $\mu$ L]         | Median       | $\leq 4.50$ vs $> 4.50$     | 0.563                    | failed              |                           |                     |
|                                         | lower cutoff | $< 4.26$ vs $\geq 4.26$     | 0.135                    | failed              |                           |                     |
|                                         | upper cutoff | $\leq 4.75$ vs $> 4.75$     | 2.145                    | failed              |                           |                     |
| thrombocytes<br>[1000/ $\mu$ L]         | Median       | $\leq 268.50$ vs $> 268.50$ | 0.797                    | failed              |                           |                     |
|                                         | lower cutoff | $< 239.00$ vs $\geq 239.00$ | 1.926                    | failed              |                           |                     |
|                                         | upper cutoff | $\leq 296.00$ vs $> 296.00$ | 2.787                    | failed              |                           |                     |
| abs.<br>neutrophiles<br>[1000/ $\mu$ L] | Median       | $\leq 4.66$ vs $> 4.66$     | 2.268                    | failed              |                           |                     |
|                                         | lower cutoff | $< 4.20$ vs $\geq 4.20$     | 1.815                    | failed              |                           |                     |
|                                         | upper cutoff | $\leq 6.3$ vs $> 6.3$       | 0.333                    | failed              |                           |                     |
| rel. neutros<br>[%]                     | Median       | $\leq 70.30$ vs $> 70.30$   | 2.827                    | failed              |                           |                     |
|                                         | lower cutoff | $< 66.00$ vs $\geq 66.00$   | 2.067                    | failed              |                           |                     |
|                                         | upper cutoff | $\leq 73.60$ vs $> 73.60$   | 2.772                    | failed              |                           |                     |
| abs.<br>eosinophile<br>[1000/ $\mu$ L]  | Median       | $\leq 0.10$ vs $> 1.10$     | 2.710                    | failed              |                           |                     |
|                                         | lower cutoff | $< 0.11$ vs $\geq 0.11$     | 2.709                    | failed              |                           |                     |
|                                         | upper cutoff | $\leq 0.22$ vs $> 0.22$     | 0.051                    | failed              |                           |                     |
| rel.<br>eosinophile<br>[%]              | Median       | $\leq 1.50$ vs $> 1.50$     | 1.469                    | failed              |                           |                     |
|                                         | lower cutoff | $< 1.40$ vs $\geq 1.40$     | 0.576                    | failed              |                           |                     |
|                                         | upper cutoff | $\leq 2.70$ vs $> 2.70$     | 0.882                    | failed              |                           |                     |
| abs.<br>basophile<br>[1000/ $\mu$ L]    | Median       | $\leq 0.04$ vs $> 0.04$     | 2.290                    | failed              |                           |                     |
|                                         | lower cutoff | $< 0.04$ vs $\geq 0.04$     | 2.349                    | failed              |                           |                     |
|                                         | upper cutoff | $\leq 0.07$ vs $> 0.07$     | $< 0.001$                | candidate           | 0.627                     | failed              |
| rel. basophile<br>[%]                   | Median       | $\leq 0.50$ vs $> 0.50$     | 1.805                    | failed              |                           |                     |
|                                         | lower cutoff | $< 0.50$ vs $\geq 0.50$     | 1.736                    | failed              |                           |                     |
|                                         | upper cutoff | $\leq 0.80$ vs $> 0.80$     | 0.513                    | failed              |                           |                     |
| abs.<br>monocytes<br>[1000/ $\mu$ L]    | Median       | $\leq 0.61$ vs $> 0.61$     | 0.123                    | failed              |                           |                     |
|                                         | lower cutoff | $< 0.52$ vs $\geq 0.52$     | 0.549                    | failed              |                           |                     |
|                                         | upper cutoff | $\leq 0.76$ vs $> 0.76$     | 0.051                    | failed              |                           |                     |
| rel.<br>monocytes<br>[%]                | Median       | $\leq 8.55$ vs $> 8.55$     | 1.724                    | failed              |                           |                     |
|                                         | lower cutoff | $< 8.00$ vs $\geq 8.00$     | 2.085                    | failed              |                           |                     |
|                                         | upper cutoff | $\leq 10.00$ vs $> 10.00$   | 0.285                    | failed              |                           |                     |
| abs.<br>lymphozyten<br>[1000/ $\mu$ L]  | Median       | $\leq 1.32$ vs $> 1.32$     | 1.649                    | failed              |                           |                     |
|                                         | lower cutoff | $< 1.07$ vs $\geq 1.07$     | 1.095                    | failed              |                           |                     |
|                                         | upper cutoff | $\leq 1.69$ vs $> 1.69$     | 2.190                    | failed              |                           |                     |
| rel.<br>lymphozyten<br>[%]              | Median       | $\leq 18.05$ vs $> 18.05$   | 1.555                    | failed              |                           |                     |
|                                         | lower cutoff | $< 15.40$ vs $\geq 15.40$   | 2.019                    | failed              |                           |                     |
|                                         | upper cutoff | $\leq 22.70$ vs $> 22.70$   | 1.086                    | failed              |                           |                     |
| NLR                                     | Median       | $\leq 3.80$ vs $> 3.80$     | 1.119                    | failed              |                           |                     |
|                                         | lower cutoff | $< 3.20$ vs $\geq 3.20$     | 1.104                    | failed              |                           |                     |
|                                         | upper cutoff | $\leq 5.10$ vs $> 5.10$     | 2.655                    | failed              |                           |                     |

**Supplementary Table 3:** Summary of Bonferroni corrected p-values from log rank testing of univariate overall survival correlations with T cell populations assed by flow cytometry.

| factor                       | description  | category         | discovery cohort<br>n=92 |                     | validation cohort<br>n=49 |                     |
|------------------------------|--------------|------------------|--------------------------|---------------------|---------------------------|---------------------|
|                              |              |                  | log rank<br>p-value      | inter-<br>pretation | log rank<br>p-value       | inter-<br>pretation |
| Lymphocytes                  | median       | ≤ 50.6 vs > 50.6 | 0.771                    | failed              |                           |                     |
|                              | lower cutoff | < 42.3 vs ≥ 42.3 | 2.661                    | failed              |                           |                     |
|                              | upper cutoff | ≤ 53.4 vs > 53.4 | 2.286                    | failed              |                           |                     |
| CD3<br>[%Lymphocytes]        | Median       | ≤ 68.5 vs > 68.5 | 2.260                    | failed              |                           |                     |
|                              | lower cutoff | < 61.2 vs ≥ 61.2 | 2.994                    | failed              |                           |                     |
|                              | upper cutoff | ≤ 74.9 vs > 74.9 | 0.141                    | failed              |                           |                     |
| Tregs [%CD3]                 | median       | ≤ 3.6 vs > 3.6   | 0.491                    | failed              |                           |                     |
|                              | lower cutoff | < 3.1 vs ≥ 3.1   | 0.129                    | failed              |                           |                     |
|                              | upper cutoff | ≤ 74.9 vs > 74.9 | 0.306                    | failed              |                           |                     |
| LAG3 [%Tregs]                | median       | ≤ 1.4 vs > 1.4   | 2.438                    | failed              |                           |                     |
|                              | lower cutoff | < 1.2 vs ≥ 1.2   | 2.010                    | failed              |                           |                     |
|                              | upper cutoff | ≤ 2 vs > 2       | 2.406                    | failed              |                           |                     |
| PD1 [%Tregs]                 | median       | ≤ 15.8 vs > 15.8 | 1.733                    | failed              |                           |                     |
|                              | lower cutoff | < 13.5 vs ≥ 13.5 | 2.091                    | failed              |                           |                     |
|                              | upper cutoff | ≤ 17.9 vs > 17.9 | 1.308                    | failed              |                           |                     |
| TIM3 [%Tregs]                | median       | ≤ 10.9 vs > 10.9 | 2.852                    | failed              |                           |                     |
|                              | lower cutoff | < 9 vs ≥ 9       | 1.371                    | failed              |                           |                     |
|                              | upper cutoff | ≤ 13.4 vs > 13.4 | 0.396                    | failed              |                           |                     |
| CD4 without<br>Tregs [%CD3]  | median       | ≤ 61 vs > 61     | 1.785                    | failed              |                           |                     |
|                              | lower cutoff | < 54.1 vs ≥ 54.1 | 1.677                    | failed              |                           |                     |
|                              | upper cutoff | ≤ 66.5 vs > 66.5 | 2.595                    | failed              |                           |                     |
| LAG3 [%CD4<br>without Tregs] | median       | ≤ 0.3 vs > 0.3   | 2.669                    | failed              |                           |                     |
|                              | lower cutoff | < 0.4 vs ≥ 0.4   | 2.670                    | failed              |                           |                     |
|                              | upper cutoff | ≤ 0.9 vs > 0.9   | 0.231                    | failed              |                           |                     |
| PD1[ %CD4<br>without Tregs]  | median       | ≤ 11.1 vs > 11.1 | 1.516                    | failed              |                           |                     |
|                              | lower cutoff | < 8.6 vs ≥ 8.6   | 0.903                    | failed              |                           |                     |
|                              | upper cutoff | ≤ 14.7 vs > 14.7 | 2.637                    | failed              |                           |                     |
| TIM3[%CD4<br>without Tregs]  | median       | ≤ 5.7 vs > 5.7   | 0.763                    | failed              |                           |                     |
|                              | lower cutoff | < 4.6 vs ≥ 4.6   | 2.820                    | failed              |                           |                     |
|                              | upper cutoff | ≤ 7.8 vs > 7.8   | 2.307                    | failed              |                           |                     |
| CD8 [%CD3]                   | median       | ≤ 20.0 vs > 20.0 | 2.806                    | failed              |                           |                     |
|                              | lower cutoff | < 16.9 vs ≥ 16.9 | 2.013                    | failed              |                           |                     |
|                              | upper cutoff | ≤ 25.2 vs > 25.2 | 2.454                    | failed              |                           |                     |
| CD25 [%CD8]                  | median       | ≤ 7.0 vs > 7.0   | 2.955                    | failed              |                           |                     |
|                              | lower cutoff | < 5.6 vs ≥ 5.6   | 2.451                    | failed              |                           |                     |
|                              | upper cutoff | ≤ 12.9 vs > 12.9 | 1.974                    | failed              |                           |                     |
| LAG3 [%CD8]                  | median       | ≤ 0.5 vs > 0.5   | 2.108                    | failed              |                           |                     |
|                              | lower cutoff | < 0.9 vs ≥ 0.9   | 0.561                    | failed              |                           |                     |
|                              | upper cutoff | ≤ 1.7 vs > 1.7   | 1.545                    | failed              |                           |                     |
| PD1 [%CD8]                   | median       | ≤ 18.1 vs > 18.1 | 1.721                    | failed              |                           |                     |
|                              | lower cutoff | < 13.9 vs ≥ 13.9 | 2.898                    | failed              |                           |                     |
|                              | upper cutoff | ≤ 25.9 vs > 25.9 | 0.657                    | failed              |                           |                     |
| TIM3 [%CD8]                  | median       | ≤ 14.8 vs > 14.8 | 0.869                    | failed              |                           |                     |
|                              | lower cutoff | < 11.9 vs ≥ 11.9 | 1.263                    | failed              |                           |                     |
|                              | upper cutoff | ≤ 21.0 vs > 21.0 | 2.154                    | failed              |                           |                     |

**Supplementary Table 4:** Summary of Bonferroni corrected p-values from log rank testing of univariate overall survival correlations with myeloid cell populations assed by flow cytometry.

| factor                         | description  | category                | discovery cohort<br>n=92 |                     | validation cohort<br>n=49 |                     |
|--------------------------------|--------------|-------------------------|--------------------------|---------------------|---------------------------|---------------------|
|                                |              |                         | log rank<br>p-value      | inter-<br>pretation | log rank<br>p-value       | inter-<br>pretation |
| M-MDSC                         | median       | $\leq 13.8$ vs $> 13.8$ | 2.179                    | failed              |                           |                     |
|                                | lower cutoff | $< 10.8$ vs $\geq 10.8$ | 1.211                    | failed              |                           |                     |
|                                | upper cutoff | $\leq 18.1$ vs $> 18.1$ | <b>0.030</b>             | <b>candidate</b>    | <b>&lt;0.001</b>          | <b>confirmed</b>    |
| classical<br>monocytes         | median       | $\leq 8.7$ vs $> 8.7$   | 1.264                    | failed              |                           |                     |
|                                | lower cutoff | $< 6.6$ vs $\geq 6.6$   | 0.719                    | failed              |                           |                     |
|                                | upper cutoff | $\leq 10.8$ vs $> 10.8$ | 1.925                    | failed              |                           |                     |
| intermediate<br>monocytes      | median       | $\leq 1.2$ vs $> 1.2$   | 2.031                    | failed              |                           |                     |
|                                | lower cutoff | $< 1.4$ vs $\geq 1.4$   | 1.853                    | failed              |                           |                     |
|                                | upper cutoff | $\leq 3.0$ vs $> 3.0$   | 2.327                    | failed              |                           |                     |
| non-<br>classical<br>monocytes | median       | $\leq 0.2$ vs $> 0.2$   | 2.081                    | failed              |                           |                     |
|                                | lower cutoff | $< 0.2$ vs $\geq 0.2$   | 0.819                    | failed              |                           |                     |
|                                | upper cutoff | $\leq 3.0$ vs $> 3.0$   | 0.179                    | failed              |                           |                     |

**Supplementary Table 5:** Summary of median frequencies, counts, interquartile range (IQR) of the investigated cell populations in patients in the M-MDSC-low versus M-MDSC-high group. P-values have been determined using Mann-Whitney U testing.

|                                       | cell population                  | p                | M-MDSC low |      | M-MDSC high |      |
|---------------------------------------|----------------------------------|------------------|------------|------|-------------|------|
|                                       |                                  |                  | median     | IQR  | median      | IQR  |
| serum blood parameters                | leukocytes [1000/ $\mu$ L]       | <b>0.015</b>     | 6.8        | 2.7  | 8.2         | 4.0  |
|                                       | erythrocytes[1mio/ $\mu$ L]      | 0.817            | 4.5        | 0.7  | 4.5         | 0.8  |
|                                       | thrombocytes [1000/ $\mu$ L]     | 0.161            | 252        | 85.3 | 280.5       | 79.8 |
|                                       | abs. neutrophils [1000/ $\mu$ L] | <b>0.001</b>     | 4.4        | 2.5  | 6.0         | 3    |
|                                       | rel. neutrophils [%]             | <b>&lt;0.001</b> | 66         | 12.3 | 75          | 9.5  |
|                                       | abs. eosinophils [1000/ $\mu$ L] | <b>0.044</b>     | 0.1        | 0.1  | 0.1         | 0.1  |
|                                       | rel. eosinophils [%]             | <b>0.005</b>     | 1.9        | 1.7  | 1           | 1.4  |
|                                       | abs. basophils [1000/ $\mu$ L]   | 0.973            | <0.1       | <0.1 | <0.1        | 0.1  |
|                                       | rel. basophils [%]               | 0.127            | 0.6        | 0.4  | 0.4         | 0.4  |
|                                       | abs. monocytes [1000/ $\mu$ L]   | <b>0.001</b>     | 0.6        | 0.3  | 0.7         | 0.3  |
|                                       | rel. monocytes [%]               | 0.131            | 8.5        | 2.6  | 9           | 2.6  |
|                                       | abs. lymphocytes [1000/ $\mu$ L] | <b>&lt;0.001</b> | 1.5        | 0.8  | 1.0         | 0.7  |
|                                       | rel. lymphocytes [%]             | <b>&lt;0.001</b> | 21.8       | 11.1 | 14.4        | 6.5  |
|                                       | NLR                              | <b>&lt;0.001</b> | 3.0        | 2.2  | 5.1         | 4.1  |
| flow cytometry                        | lymphocytes                      | <b>&lt;0.001</b> | 51.4       | 17.5 | 32.6        | 13.5 |
|                                       | CD3+ [lymphocytes]               | <b>0.015</b>     | 72         | 10.6 | 68.0        | 18.4 |
|                                       | Tregs [CD3]                      | 0.378            | 3.8        | 1.7  | 4.0         | 1.9  |
|                                       | LAG-3+Tregs                      | 0.981            | 1.1        | 1.3  | 1.2         | 1.3  |
|                                       | PD-1+Tregs                       | <b>0.025</b>     | 12.5       | 9.7  | 14.1        | 7.1  |
|                                       | TIM-3+Tregs                      | 0.761            | 8.5        | 7.5  | 8.7         | 6.7  |
|                                       | CD4+ [CD3]                       | 0.338            | 61         | 17.6 | 60.2        | 21   |
|                                       | LAG-3+CD4                        | 0.554            | 0.3        | 0.3  | 0.3         | 0.4  |
|                                       | PD-1+CD4                         | 0.131            | 10.2       | 8.7  | 10.5        | 9.4  |
|                                       | TIM-3+CD4                        | 0.988            | 4.5        | 4.0  | 5.0         | 4.7  |
|                                       | CD8+ [CD3]                       | 0.759            | 21.5       | 14.4 | 20.6        | 19.1 |
|                                       | CD25+CD8                         | 0.655            | 7.5        | 13.2 | 6.3         | 7.7  |
|                                       | LAG-3+CD8                        | 0.511            | 0.5        | 1.2  | 0.75        | 1.4  |
|                                       | PD-1+CD8                         | 0.146            | 15.4       | 12.5 | 18.3        | 20.2 |
|                                       | TIM-3+CD8                        | 0.251            | 10.9       | 12.0 | 11.5        | 15.4 |
| classical monocytes [viable PBMCs]    | 0.101                            | 8.7              | 5.8        | 10.0 | 6.8         |      |
| intermediate monocytes [viable PBMC]  | <b>0.031</b>                     | 1.1              | 1.4        | 1.4  | 2.1         |      |
| non-classical monocytes [viable PBMC] | 0.389                            | 0.2              | 0.2        | 0.1  | 0.2         |      |
